# Supplementary material for: MOTHER-OF-FT-AND-TFL1 represses seed germination under far-red light by modulating phytohormone responses in Arabidopsis thaliana
Source: PubMed Central journal article supplement — Proc Natl Acad Sci U S A. 2018 Jul 30;115(33):8442–7. doi: 10.1073/pnas.1806460115 (PMC6099910; doi:10.1073/pnas.1806460115), 2018-07-30
Supplement: pnas.1806460115.sapp.pdf [file pnas.1806460115.sapp.pdf]

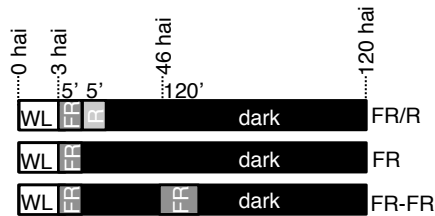

**Fig. S1** Schematic representation of the experimental set-up: After-ripened seeds were imbibed for 3 h under white light (WL); then treated with (i) two consecutive 5 minute (5') FR and R light pulses (FR/R); (ii) only one 5' FR pulse (FR); and (iii) an initial 5' FR pulse followed (46-hours-after-imbibition, hai) by a second 120' FR pulse (FR-FR). At all other times seeds were kept in the dark. Seed germination was scored 5 days-after-imbibition (120 hai).

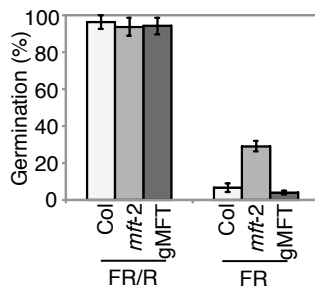

**Fig. S2.** Germination of complemented *mft-2* seeds. Wild-type (Col), *mft-2* and *mft-2* complemented with the wild-type *MFT* gene (gMFT). After-ripened seeds were treated with FR/R and FR light as indicated in Fig. S1. Germination was scored 5 days-after-imbibition. Data are the means of four biological replicates and error bars represent standard deviation. Asterisk indicates statistically significant difference (*t*-test,  $p < 0.01$ ).

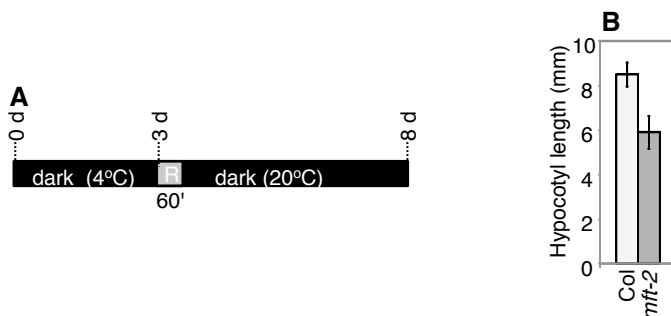

**Fig. S3.** Hypocotyl length of *mft-2* seedlings. (A) Schematic representation of the experimental set-up: Imbibed seeds were kept for 3 d in the dark at 4°C, then treated with red light (R) for 60 minutes (60'), and finally kept for 5 days in the dark at 20°C before scoring hypocotyl length. (B) Hypocotyl length of wild-type (Col) and *mft-2* seedlings. Data are means of ten biological replicates and error bars represent standard deviation. Asterisk indicates statistically significant difference (*t*-test,  $p < 0.01$ ).

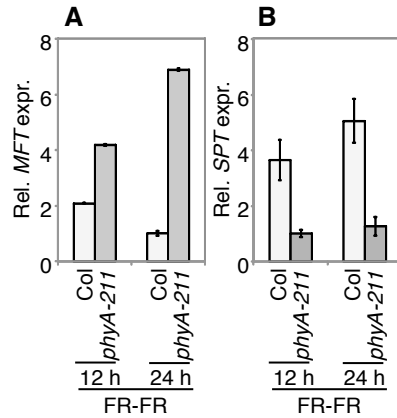

**Fig. S4.** Gene expression in *phyA-211* mutant seeds. (A-B) Relative *MFT* and *SPT* transcript accumulation in FR-FR treated seeds 12 and 24 h after the second FR-treatment. Error bars represent standard error of three qPCR replicates.

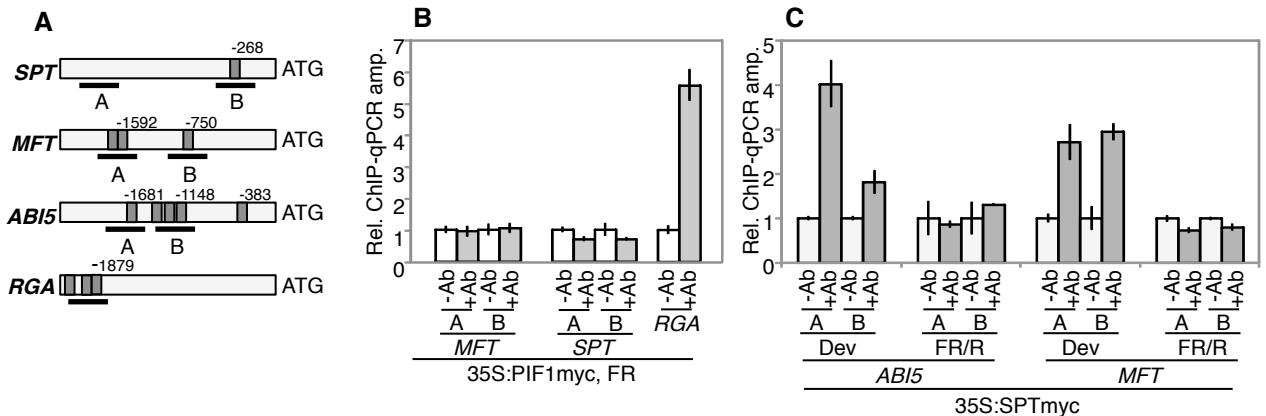

**Fig. S5.** Characterisation of interactions of PIF1 and MFT with selected gene promoters. (A) Schematic diagram of *SPT*, *MFT*, *ABI5* and *RGA* promoters. Dark gray boxes represent G-box motifs (CACGTG). Negative numbers indicates G-box positions with respect to the ATG start codon. Horizontal black lines indicate regions assessed (as previously described; (1)) for protein-DNA interactions by chromatin immuno-precipitations (ChIP) followed by quantitative PCR (qPCR). (B-C) ChIP-qPCR analyses of imbibed seeds (24 hai) of epitope-tagged FR-treated 35S:PIF1myc (B) and FR/R-treated 35S:SPTmyc (C) transgenic seeds. ChIPs were performed with anti-Myc Ab (+Ab) or anti-HA (-Ab) as negative controls. qPCR amplifications were normalized to an internal unrelated control region (*UBQ11*) and plotted relative to the -Ab negative control. The PIF1-*RGA* interaction (in B) and *SPT*-*MFT* in developing seeds (Dev; in C) were used as a positive ChIP-qPCR controls. Error bars represent standard error of three qPCR replicates.

| Name           | Sequence                    |
|----------------|-----------------------------|
| qMFT-For       | ATCACTAACGGCTGCGAGAT        |
| qMFT-Rev       | CGGGAATATCCACGACAATC        |
| qABI5-For      | CAATAAGAGAGGGATAGCGAACGAG   |
| qABI5-Rev      | CGTCCATTGATGTCTCCTCCA       |
| qSPT-For       | TGCTTGATGAAGCCATTGAG        |
| qSPT-Rev       | TGATCATTTCGGGTGCATTA        |
| qUBQ11-For     | TTCATTGGGTCTTGCGTCTG        |
| qUBQ11-Rev     | GAAGATGAGACGCTGCTGGT        |
| chipMFT-A-For  | CCAATCGATCGAGTACCACA        |
| chipMFT-A-Rev  | GCCATTTGAAACTCCTTTGC        |
| chipMFT-B-For  | CGACCGACCATAAATCATACG       |
| chipMFT-B-Rev  | CACGTGTTGCATGATTAGCC        |
| chipSPT-A-For  | TCGATTTTCATCCGATGCAGA       |
| chipSPT-A-Rev  | TCCAAAACCTTTTCCTCGTC        |
| chipSPT-B-For  | GGTTGTATATTATTTGTTACCCCAAAA |
| chipSPT-B-Rev  | AGCATGAGCTTGTGTAGC          |
| chipABI5-A-For | TTAGGTCGCTGGTTCCGATTC       |
| chipABI5-A-Rev | CATGATTCCGAACTTCCATTG       |
| chipABI5-B-For | TGTGTAGCCGAAGTCACACGTG      |
| chipABI5-B-Rev | CTTTCGACCAATGGAATGCT        |
| chipRGA-For    | CAGACTCGGTCCCTACCGTTT       |
| chipRGA-Rev    | GCCGTCATTAACGGCCTCTTTCT     |

**Table S1.** Sequence of primers used in tis study.

| sample              | file                          | raw_count | minus_rRNA | percentage_rRNA | mapped_reads_Q20 | percentage_mapped_Q20 |
|---------------------|-------------------------------|-----------|------------|-----------------|------------------|-----------------------|
| Col FR (24hai) #1   | ./F1_S69_L008_R1_001.fastq.gz | 14299154  | 13274012   | 7.17            | 18531949         | 69.81                 |
|                     | ./F1_S69_L008_R2_001.fastq.gz | 14299154  | 13274012   | 7.17            |                  |                       |
| Col FR (24hai) #2   | ./F2_S70_L008_R1_001.fastq.gz | 26511193  | 24502415   | 7.58            | 39539111         | 80.68                 |
|                     | ./F2_S70_L008_R2_001.fastq.gz | 26511193  | 24502415   | 7.58            |                  |                       |
| Col FR (24hai) #3   | ./F3_S71_L008_R1_001.fastq.gz | 16749808  | 15883995   | 5.17            | 24608385         | 77.46                 |
|                     | ./F3_S71_L008_R2_001.fastq.gz | 16749808  | 15883995   | 5.17            |                  |                       |
| Col FR/R (24hai) #1 | ./F4_S72_L008_R1_001.fastq.gz | 22553178  | 21758137   | 3.53            | 34415602         | 79.09                 |
|                     | ./F4_S72_L008_R2_001.fastq.gz | 22553178  | 21758137   | 3.53            |                  |                       |
| Col FR/R (24hai) #2 | ./F5_S73_L008_R1_001.fastq.gz | 12343199  | 11659903   | 5.54            | 19442635         | 83.37                 |
|                     | ./F5_S73_L008_R2_001.fastq.gz | 12343199  | 11659903   | 5.54            |                  |                       |
| Col FR/R (24hai) #3 | ./F6_S74_L008_R1_001.fastq.gz | 13980663  | 12577893   | 10.03           | 17776434         | 70.67                 |
|                     | ./F6_S74_L008_R2_001.fastq.gz | 13980663  | 12577893   | 10.03           |                  |                       |
| mft-2 FR (24hai) #1 | ./F7_S75_L008_R1_001.fastq.gz | 17475160  | 16582783   | 5.11            | 25079694         | 75.62                 |
|                     | ./F7_S75_L008_R2_001.fastq.gz | 17475160  | 16582783   | 5.11            |                  |                       |
| mft-2 FR (24hai) #2 | ./F8_S76_L008_R1_001.fastq.gz | 20302816  | 19049813   | 6.17            | 29691651         | 77.93                 |
|                     | ./F8_S76_L008_R2_001.fastq.gz | 20302816  | 19049813   | 6.17            |                  |                       |
| mft-2 FR (24hai) #3 | ./F9_S77_L008_R1_001.fastq.gz | 20458216  | 18789459   | 8.16            | 29997949         | 79.83                 |
|                     | ./F9_S77_L008_R2_001.fastq.gz | 20458216  | 18789459   | 8.16            |                  |                       |

**Table S2.** RNAseq reads statistics.

## REFERENCES

1. Vaistij FE, *et al.* (2013) Differential control of seed primary dormancy in Arabidopsis ecotypes by the transcription factor SPATULA. *Proc Natl Acad Sci U S A* 110 (26):10866-10871.
